# Supplementary material for: The nitrogen budget of laboratory-simulated western US wildfires during the FIREX 2016 Fire Lab study
Source: Copernicus journal article supplement (doi:10.5194/acp-20-8807-2020), 2020-07-24
Supplement: Supplementary file 1 [file acp-20-8807-2020-supplement.zip]

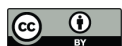

## *Supplement of*

# **The nitrogen budget of laboratory-simulated western US wildfires during the FIREX 2016 Fire Lab study**

**James M. Roberts et al.**

*Correspondence to:* James M. Roberts ([james.m.roberts@noaa.gov](mailto:james.m.roberts@noaa.gov))

- [acp-20-8807-2020-supplement-title-page.pdf](#)
- SI
  - [Supplemental Material.docx](#)
  - [Table\\_S1.xlsx](#)

The copyright of individual parts of the supplement might differ from the CC BY 4.0 License.
